# Supplementary material
Source: PubMed Central journal article supplement (PMC4152907)

Supplemental data

**$\alpha$ -Bgtx TITLE: The novel  $\alpha 7\beta 2$ -nicotinic acetylcholine receptor subtype is expressed in mouse and human basal forebrain: Biochemical and pharmacological characterisation**

Milena Moretti, Michele Zoli, Andrew A George, Ronald J Lukas, Francesco Pistillo, Uve Maskos, Paul Whiteaker, and Cecilia Gotti

**Supplementary figure 1: Specificity of the subunit-specific polyclonal antibodies tested in 2% TritonX-100 extracts of mouse brain tissue:** Specificity was tested by immunoprecipitation in extracts of  $\alpha 7^{+/+}$  and  $\alpha 7^{-/-}$  mouse hippocampus of  $\alpha 7$  mice, and  $\beta 2^{+/+}$  and  $\beta 2^{-/-}$  mouse coetex, as described in Materials and Methods. The extracts were labelled with 5 nM [ $^{125}$ I]- $\alpha$ -Bungarotoxin ( $\alpha$ -Bgtx), or with 1 nM [ $^3$ H]-Epibatidine (Epi).

**% of [ $^{125}$ I]- $\alpha$ -Bgtx labeled receptors immunoprecipitated**

| Antibodies           | $\alpha 7^{+/+}$<br>hippocampus | $\alpha 7^{-/-}$<br>hippocampus | $\beta 2^{+/+}$<br>cortex | $\beta 2^{-/-}$<br>cortex |
|----------------------|---------------------------------|---------------------------------|---------------------------|---------------------------|
| $\alpha 7$ mouse cyt | 95 $\pm$ 5 %                    | 3 $\pm$ 2                       | 91 $\pm$ 3                | 93 $\pm$ 2                |
| $\alpha 7$ COOH rat  | 90 $\pm$ 2                      | 2 $\pm$ 2                       | 92 $\pm$ 2                | 90 $\pm$ 2                |

**% of [ $^3$ H]-Epi labeled receptors immunoprecipitated**

| Antibodies                 | $\alpha 7^{+/+}$<br>hippocampus | $\alpha 7^{-/-}$<br>hippocampus | $\beta 2^{+/+}$<br>cortex | $\beta 2^{-/-}$<br>cortex |
|----------------------------|---------------------------------|---------------------------------|---------------------------|---------------------------|
| $\beta 2$ human cyt<br>(1) | 95 $\pm$ 5 %                    | 92 $\pm$ 2                      | 91 $\pm$ 3                | 3 $\pm$ 2                 |
| $\beta 2$ COOH Rat         | 90 $\pm$ 2                      | 85 $\pm$ 3                      | 92 $\pm$ 2                | 2 $\pm$ 2                 |

The reported values are expressed as % of specific immunoprecipitation calculated from binding to the extract, and are the mean  $\pm$  SEM of three determinations.

The same extracts were also analyzed by western blotting with the indicated Abs:  $\beta 2$  (top) and  $\alpha 7$  (bottom) On the left the standard molecular weight is expressed in kDa.

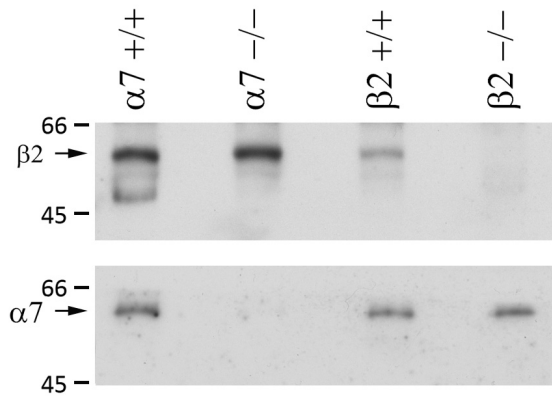

**Supplementary figure 2: Specificity of the subunit-specific polyclonal antibodies tested in 2% TritonX-100 extracts of nAChR-expressing cell lines:** Specificity was tested by immunoprecipitation of nAChR from extracts of HEK cells transfected with the  $\alpha 2\beta 4$ ,  $\alpha 4\beta 2$ ,  $\alpha 3\beta 4$ , or SH-SY5Y cells transfected with  $\alpha 7$  subunits as described in Materials and Methods. The extracts were labelled with 2nM [ $^3\text{H}$ ]-Epi. The reported values are expressed as % of specific immunoprecipitation, and are the mean  $\pm$  SEM of three determinations

| % of [ $^3\text{H}$ ]- Epi labeled receptors immunoprecipitated |                   |                   |                   |            |
|-----------------------------------------------------------------|-------------------|-------------------|-------------------|------------|
| Antibodies                                                      | $\alpha 2\beta 4$ | $\alpha 4\beta 2$ | $\alpha 3\beta 4$ | $\alpha 7$ |
| Anti- $\alpha 2$ human                                          | 90 $\pm$ 2 %      | 2                 | 3                 | 3          |
| Anti- $\alpha 3$ human                                          | 2 $\pm$ 2         | 0                 | 92 $\pm$ 2        | 2 $\pm$ 2  |
| Anti- $\alpha 4$ human                                          | 2                 | 95 $\pm$ 2        | 0                 | 0          |
| Anti- $\beta 2$ human                                           | 2 $\pm$ 1         | 93 $\pm$ 2        | 0                 | 0          |
| Anti- $\beta 4$ human                                           | 85 $\pm$ 4        | 2                 | 92 $\pm$ 3        | 0          |

The same extracts were also analyzed by Western blotting and probed with the indicated Abs anti- $\alpha 7$  (top), anti- $\beta 2$  (middle) anti- $\beta 4$  (bottom). On the left the standard molecular weight is expressed in kDa

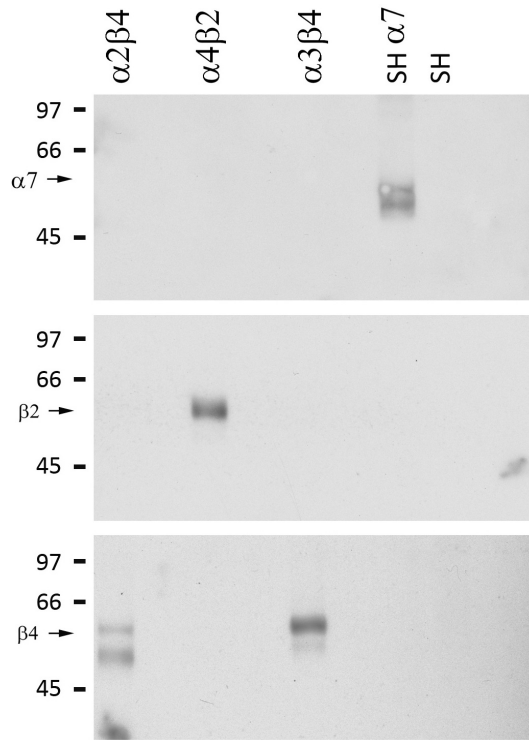

Supplement: supp_mol.114.093377_supplemental_data_rev_93377.pdf [file supp_mol.114.093377_supplemental_data_rev_93377.pdf]
